# Supplementary material
Source: PubMed Central journal article supplement (PMC2913183)
Supplement: mmc1.pdf [file mmc1.pdf]

Biophysical Journal, Volume 99

**Supporting Material**

**Distribution of Electromechanical Delay in the Heart: Insights from a 3D  
Electromechanical Model**

Viatcheslav Gurev, Jason Constantino, John Jeremy Rice, and Natalia A Trayanova

**Online Supplement**

|                |          |
|----------------|----------|
| C              | 0.95 kPa |
| b <sub>1</sub> | 4.0      |
| b <sub>2</sub> | 3.42     |
| b <sub>3</sub> | 1.63     |

**Table S1** Material parameters of the strain energy function

| <b>Time-varying elastance atrial model</b> |                  |
|--------------------------------------------|------------------|
| E <sub>LA,max</sub>                        | 0.0782 kPa/ml    |
| E <sub>LA,min</sub>                        | 0.0711 kPa/ml    |
| V <sub>LA,rd</sub>                         | 0.61 ml          |
| V <sub>LA,rs</sub>                         | 0.56 ml          |
| E <sub>RA,min</sub>                        | 0.03 kPa/ml      |
| E <sub>RA,min</sub>                        | 0.0273 kPa/ml    |
| V <sub>RA,rd</sub>                         | 0.61 ml          |
| V <sub>RA,rs</sub>                         | 0.56 ml          |
| <b>Systemic Circulation</b>                |                  |
| R <sub>ao</sub>                            | 0.0056 kPa*s/ml  |
| R <sub>mitral</sub>                        | 0.004 kPa*s/ml   |
| R <sub>as</sub>                            | 1.92 kPa*s/ml    |
| R <sub>vs</sub>                            | 0.41120 kPa*s/ml |
| C <sub>as</sub>                            | 6.52 ml/kPa      |
| C <sub>vs</sub>                            | 86.6 ml/kPa      |
| <b>Pulmonic Circulation</b>                |                  |
| R <sub>tricus</sub>                        | 0.004 kPa*s/ml   |
| R <sub>pa</sub>                            | 0.032 kPa*s/ml   |
| R <sub>ap</sub>                            | 0.0404 kPa*s/ml  |
| R <sub>vp</sub>                            | 0.0404 kPa*s/ml  |
| C <sub>ap</sub>                            | 8.34 ml/kPa      |
| C <sub>vp</sub>                            | 10.0 ml/kPa      |

**Table S2** Adjusted parameters of the Kerckhoffs et al. circulatory model

| <b>Extracellular (ms/mm)</b> |        |
|------------------------------|--------|
| Longitudinal                 | 3.75   |
| Tranverse                    | 0.1428 |
| <b>Intracellular (mS/mm)</b> |        |
| Longitudinal                 | 1.044  |
| Tranverse                    | 0.2    |

**Table S3** Electrical conductivity values

| Parameter                                 | BCL=350ms | BCL=250ms |
|-------------------------------------------|-----------|-----------|
| $\tau_1$ ms                               | 20        | 20        |
| $\tau_2$ ms                               | 60        | 120       |
| $Ca_{diastolic}$ $\mu\text{M}$            | 0.01      | 0.01      |
| $k_{on}$ $\mu\text{M}^{-1} \text{s}^{-1}$ | 25        | 25        |
| $k_{offL}$ $\text{s}^{-1}$                | 166.67    | 166.67    |
| $k_{offH}$ $\text{s}^{-1}$                | 16.67     | 16.67     |

**Table S4** Adjusted parameters of the Rice et al. model.

The LV and RV pressure-volume loops for SR and EP are presented in Figure S1.

Online Supplement Figures

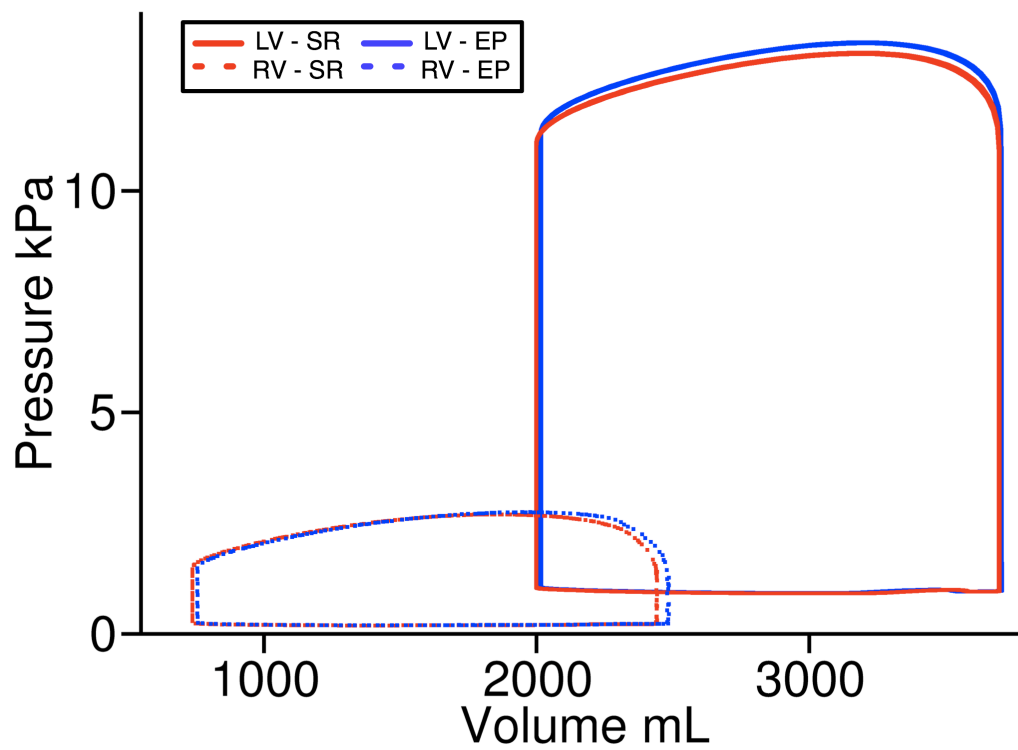

**Figure S1** LV(solid) and RV(dashed) pressure-volume loops during SR (red) and following EP(blue) for BCL=350ms.

**Anterior**

**Posterior**

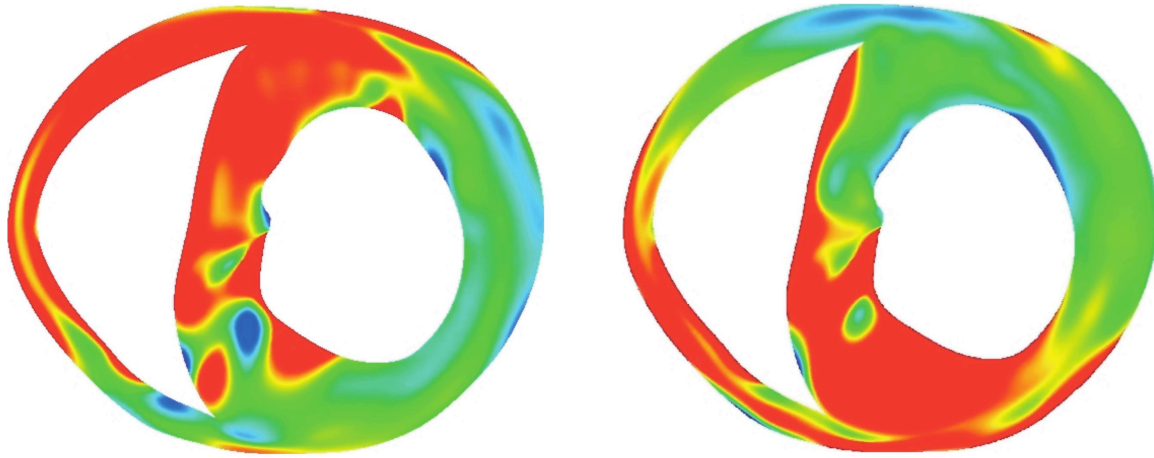

electromechanical delay  
25 ms  40 ms

**Figure S2** Transmurals maps of electromechanical delay following pacing at the anterior wall (left) and the posterior wall (right).
